# Supplementary material for: Myogenic exosome miR-140-5p modulates skeletal muscle regeneration and injury repair by regulating muscle satellite cells
Source: publisher site journal article supplement (doi:10.18632/aging.205617), 2024-02-29
Supplement: Supplementary file [file aging-v16i5-205617-supplementary-material-SD1.pdf]

## SUPPLEMENTARY MATERIAL

### AAV vector and target gene information

#### *Destination carrier information*

See Supplementary Figure 1.

#### *Target gene sequence information*

mmu-miR-140-5p MIMAT0000151: CAGUGGUUUUACCCUAUGGUAG

Change U to T: CAGTGGTTTTACCCTATGGTAG

Reverse complementary mutation sequence: CTACCATAGGTACAACCACTG

Sponge structure (reverse complementary sequence concatenation after four mutations):

CTACCATAGGTACAACCACTGtatacCTACCATAGGTACAACCACTGacatcCTACCATAGGTACAACCACTG  
tctcaCTACCATAGGTACAACCACTG

### Construction of dual luciferase vector

#### *Vector plasmid map*

See Supplementary Figure 2.

### Sequence information

**Gene name:** Pax7-Mut      **Sequence length:** 435

#### **Pax7-Mut Sequence:**

caca  
4081 gctgcaagca ccccttcaa agacaaatg catcctctc cacattcctt gtcctctgga  
4141 ggctctggctc tggatacacc tgaagtctcg ttcacctact acacttagg agcaggaact  
4201 tcaagcaggt gacatccaca gggcccagtc ccagccaagg gagcaacatt ccaacgcttg  
4261 gaccaatcat aatgatgacg ggcactccca ttggcgtact agagacctgc ttgggagaaa  
4321 acaaaatgac ttctattcc atgcatgcc tctgaatgct ccccaagct gccatcttg  
4381 tataaaatgg gactgtgtt gtggggaacc ccttgacccc aacaggtttt cccaactgtc  
4441 tcatgctttt gtgaatctgt ctgctttgat ctgtaaaact cagccttgtt tgggcag

**Gene name:** Pax7-WT      **Sequence length:** 435

#### **Pax7-WT Sequence:**

caca  
4081 gctgcaagca ccccttcaa agacaaatg catcctctc cacattcctt gtcctctgga  
4141 ggctctggctc tggatacacc tgaagtctcg ttcacctact acacttagg agcaggaact  
4201 tcaagcaggt gacatccaca gggcccagtc ccagccaagg gagcaacatt ccaacgcttg  
4261 gaccaatcat aatgatctgc ccgtgagggt aaccgcaact agagacctgc ttgggagaaa  
4321 acaaaatgac ttctattcc atgcatgcc tctgaatgct ccccaagct gccatcttg  
4381 tataaaatgg gactgtgtt gtggggaacc ccttgacccc aacaggtttt cccaactgtc  
4441 tcatgctttt gtgaatctgt ctgctttgat ctgtaaaact cagccttgtt tgggcag

**Gene name:** Pax7-WT      **Sequence length:** 435

#### **Pax7-WT Sequence:**

caca  
4081 gctgcaagca ccccttcaa agacaaatg catcctctc cacattcctt gtcctctgga  
4141 ggctctggctc tggatacacc tgaagtctcg ttcacctact acacttagg agcaggaact  
4201 tcaagcaggt gacatccaca gggcccagtc ccagccaagg gagcaacatt ccaacgcttg  
4261 gaccaatcat aatgatctgc ccgtgagggt aaccgcaact agagacctgc ttgggagaaa  
4321 acaaaatgac ttctattcc atgcatgcc tctgaatgct ccccaagct gccatcttg  
4381 tataaaatgg gactgtgtt gtggggaacc ccttgacccc aacaggtttt cccaactgtc  
4441 tcatgctttt gtgaatctgt ctgctttgat ctgtaaaact cagccttgtt tgggcag
